# Supplementary material for: Assessing disparities in air conditioning operation across Southern California
Source: Research Square preprint supplement (doi:10.21203/rs.3.rs-10103387/v1), 2026-07-01
Supplement: Supplementary file 1 [file a4534c69c1c01a3bd8afaf0e.pdf]

784

## Supplementary Information

785

Assessing disparities in air conditioning operation across Southern California

786

Diego Ramos Aguilera, Yishi Wang, Lu Zhang, Jiachen Zhang, and Kelly T. Sanders

787 *SI.1. Covariates employed in the multilinear regressions*

| <b>Variable</b>       | <b>Description (units)</b>                                | <b>Source</b> | <b>10th p.</b> | <b>Mean</b> | <b>Median</b> | <b>90th p.</b> |
|-----------------------|-----------------------------------------------------------|---------------|----------------|-------------|---------------|----------------|
| <i>Age</i>            | Age of housing (years)                                    | COT           | 13             | 43.2        | 41            | 70             |
| <i>Sqft</i>           | Size of housing (square footage)                          | COT           | 1,120          | 1,930       | 1,740         | 2,970          |
| <i>Bedrooms</i>       | Number of bedrooms                                        | COT           | 2              | 3.44        | 3             | 4              |
| <i>Value</i>          | Value of housing (thousand US\$)                          | COT           | 146            | 374         | 303           | 638            |
| <i>MedianInc</i>      | Census tract median income (thousand US\$)                | ACS           | 45.9           | 81.1        | 77.4          | 120            |
| <i>Unemployment</i>   | Unemployed population in tract (%)                        | ACS           | 3.33           | 8.31        | 7.27          | 14.5           |
| <i>Renting</i>        | Renting population in tract (%)                           | ACS           | 11.4           | 32.2        | 29.1          | 59.0           |
| <i>LivingAlone</i>    | Households in tract with a single occupant (%)            | ACS           | 8.08           | 17.6        | 15.8          | 29.6           |
| <i>Crowding</i>       | Households in tract with more than 1.5 occupants per room | ACS           | 0.00           | 2.18        | 1.04          | 6.13           |
| <i>Elderly</i>        | Population over 65 years of age in tract (%)              | ACS           | 7.02           | 14.4        | 12.6          | 22.4           |
| <i>OutdoorWorkers</i> | Outdoor workers in tract (%)                              | ACS           | 2.74           | 8.21        | 7.54          | 14.3           |
| <i>ForeignBorn</i>    | Foreign-born population in tract (%)                      | ACS           | 11.6           | 25.2        | 22.8          | 42.7           |
| <i>NonWhite</i>       | Tract population who does not identify as White (%)       | ACS           | 18.5           | 41.4        | 38.9          | 68.3           |
| <i>HispanicLatino</i> | Tract population who identifies as Hispanic or Latino (%) | ACS           | 13.5           | 41.7        | 36.5          | 77.3           |
| <i>maxT</i>           | Maximum daily temperature (°C)                            | E5L           | 15.0           | 24.4        | 24.5          | 33.5           |
| <i>CDH205</i>         | Daily cooling degree-hours above 20.5 °C (°C-hours)       | E5L           | 0.0            | 47.0        | 20.6          | 135            |
| <i>meanRH</i>         | Mean daily relative humidity (%)                          | E5L           | 31.5           | 58.2        | 61.1          | 79.9           |

Table S1: Description, sources, and descriptive statistics (mean, median, and 10th and 90th percentiles) of the covariates employed in the multilinear regression. Source codes: COT = Cotality, E5L = ERA5-Land, ACS = American Community Survey.

| <b>BCZ</b> | <b>Reference city</b> | <b>Description</b>                                                                                                                |
|------------|-----------------------|-----------------------------------------------------------------------------------------------------------------------------------|
| 6          | Santa Monica, CA      | Coastal, flat regions with mild climate year-round.                                                                               |
| 8          | Gateway Cities, CA    | Influenced by marine air, but warmer summers than BCZ 6.                                                                          |
| 9          | Covina, CA            | Influenced by both coastal and interior weather. Inland winds bring hot and dry air, while marine winds bring cool and moist air. |
| 10         | San Bernardino, CA    | Interior valleys with a more extreme annual temperature swing. Heating and cooling are needed to maintain thermal comfort.        |
| 14         | Lancaster, CA         | Medium- to high-desert zones with wide diurnal and seasonal temperature swings. A high energy-consuming climate.                  |
| 15         | Palm Springs, CA      | Low desert with extremely hot summers and moderately cold winters. Large diurnal temperature ranges due to very low humidity.     |
| 16         | Big Bear Lake, CA     | High mountainous and semiarid region with a very extreme temperature range. Very cold winters and mild summers.                   |

Table S2: Description of building climate zones (BCZ), adapted from the California Energy Commission [68].

| Temp. var.    | Dependent var.   | Time of day | Adj. R <sup>2</sup> | AIC ( $\times 10^6$ ) | BIC ( $\times 10^6$ ) | RMSE  |
|---------------|------------------|-------------|---------------------|-----------------------|-----------------------|-------|
| <i>maxT</i>   | Cooling load     | Daytime     | 0.296               | 12.59                 | 12.59                 | 0.973 |
| <i>CDH205</i> | Cooling load     | Daytime     | 0.297               | 12.54                 | 12.54                 | 0.972 |
| <i>maxT</i>   | Cooling load     | Nighttime   | 0.221               | 5.551                 | 5.552                 | 0.903 |
| <i>CDH205</i> | Cooling load     | Nighttime   | 0.223               | 5.527                 | 5.528                 | 0.902 |
| <i>maxT</i>   | Non-cooling load | Daytime     | 0.181               | -2.482                | -2.481                | 0.504 |
| <i>CDH205</i> | Non-cooling load | Daytime     | 0.179               | -2.282                | -2.282                | 0.505 |
| <i>maxT</i>   | Non-cooling load | Nighttime   | 0.158               | -14.43                | -14.43                | 0.463 |
| <i>CDH205</i> | Non-cooling load | Nighttime   | 0.158               | -14.39                | -14.39                | 0.463 |

Table S3: Comparison of ordinary least squares (OLS) model performance between maximum daily temperature (*maxT*) and cooling degree-hours (*CDH205*), showing adjusted R<sup>2</sup>, AIC, BIC, and root mean squared error (RMSE) statistics.

| Temp. var.    | Dependent var. | Time of day | Pseudo R <sup>2</sup> | AIC ( $\times 10^6$ ) | BIC ( $\times 10^6$ ) | AUC   |
|---------------|----------------|-------------|-----------------------|-----------------------|-----------------------|-------|
| <i>maxT</i>   | Cooling hours  | Daytime     | 0.286                 | 76.77                 | 76.77                 | 0.842 |
| <i>CDH205</i> | Cooling hours  | Daytime     | 0.275                 | 77.95                 | 77.95                 | 0.837 |
| <i>maxT</i>   | Cooling hours  | Nighttime   | 0.335                 | 51.62                 | 51.63                 | 0.881 |
| <i>CDH205</i> | Cooling hours  | Nighttime   | 0.332                 | 51.79                 | 51.79                 | 0.880 |

Table S4: Comparison of binary logit model performance between maximum daily temperature (*maxT*) and cooling degree-hours (*CDH205*), showing pseudo R<sup>2</sup>, AIC, BIC, and area under the curve (AUC) statistics.

| Temp. var.    | Dependent var. | Time of day | LL ( $\times 10^6$ ) | AIC ( $\times 10^6$ ) | BIC ( $\times 10^6$ ) |
|---------------|----------------|-------------|----------------------|-----------------------|-----------------------|
| <i>maxT</i>   | Cooling hours  | Daytime     | -60.39               | 120.8                 | 120.8                 |
| <i>CDH205</i> | Cooling hours  | Daytime     | -60.16               | 120.3                 | 120.3                 |
| <i>maxT</i>   | Cooling hours  | Nighttime   | -25.66               | 51.32                 | 51.32                 |
| <i>CDH205</i> | Cooling hours  | Nighttime   | -25.53               | 51.07                 | 51.07                 |

Table S5: Comparison of ordered logit model performance between maximum daily temperature (*maxT*) and cooling degree-hours (*CDH205*), showing log-likelihood (LL), AIC, and BIC statistics.

| Variable       | Delta     | $\Delta P_{USE}$              | $\Delta E_{POS}$              | $\Delta E_{TOT}$              |
|----------------|-----------|-------------------------------|-------------------------------|-------------------------------|
| Age            | 10 years  | 0.0026<br>(0.0025, 0.0027)    | 0.0089<br>(0.0083, 0.0093)    | 0.0165<br>(0.0161, 0.0168)    |
| Sqft           | 500 sqft  | -0.0031<br>(-0.0032, -0.0030) | -0.0442<br>(-0.0451, -0.0435) | -0.0393<br>(-0.0399, -0.0387) |
| Bedrooms       | 1 bedroom | 0.0014<br>(0.0013, 0.0016)    | 0.0394<br>(0.0384, 0.0406)    | 0.0296<br>(0.0289, 0.0305)    |
| Value          | \$250 k   | -0.0005<br>(-0.0006, -0.0004) | -0.0024<br>(-0.0034, -0.0015) | -0.0035<br>(-0.0042, -0.0028) |
| MedianInc      | \$10 k    | 0.0015<br>(0.0015, 0.0016)    | -0.0142<br>(-0.0147, -0.0135) | -0.0019<br>(-0.0023, -0.0014) |
| Unemployment   | 10 pp     | -0.0074<br>(-0.0076, -0.0071) | 0.0868<br>(0.0848, 0.0888)    | 0.0188<br>(0.0174, 0.0203)    |
| Renting        | 10 pp     | -0.0030<br>(-0.0031, -0.0029) | -0.0214<br>(-0.0223, -0.0205) | -0.0253<br>(-0.0259, -0.0246) |
| LivingAlone    | 10 pp     | 0.0016<br>(0.0015, 0.0018)    | -0.0034<br>(-0.0051, -0.0019) | 0.0050<br>(0.0035, 0.0064)    |
| Crowding       | 10 pp     | -0.0016<br>(-0.0020, -0.0011) | -0.1061<br>(-0.1110, -0.1024) | -0.0696<br>(-0.0731, -0.0666) |
| Elderly        | 10 pp     | -0.0050<br>(-0.0052, -0.0049) | -0.0538<br>(-0.0555, -0.0517) | -0.0534<br>(-0.0544, -0.0519) |
| OutdoorWorkers | 10 pp     | 0.0094<br>(0.0091, 0.0097)    | 0.0036<br>(0.0018, 0.0065)    | 0.0423<br>(0.0409, 0.0445)    |
| ForeignBorn    | 10 pp     | -0.0063<br>(-0.0064, -0.0061) | -0.0420<br>(-0.0438, -0.0407) | -0.0517<br>(-0.0529, -0.0508) |
| NonWhite       | 10 pp     | -0.0064<br>(-0.0065, -0.0063) | -0.0316<br>(-0.0322, -0.0309) | -0.0459<br>(-0.0463, -0.0454) |
| HispanicLatino | 10 pp     | -0.0043<br>(-0.0044, -0.0043) | -0.0127<br>(-0.0133, -0.0121) | -0.0261<br>(-0.0265, -0.0257) |
| CDH205         | 10 CDH    | 0.0235<br>(0.0235, 0.0235)    | 0.1486<br>(0.1483, 0.1488)    | 0.1916<br>(0.1914, 0.1918)    |
| meanRH         | 10 pp     | -0.0107<br>(-0.0108, -0.0107) | 0.1285<br>(0.1276, 0.1293)    | 0.0283<br>(0.0277, 0.0288)    |

Table S6: Daytime average discrete changes (ADC) in probability of any cooling use ( $\Delta P_{USE}$ ), expected hours given some cooling ( $\Delta E_{POS}$ ), and total expected hours ( $\Delta E_{TOT}$ ). The 95th percentile interval is given in parenthesis. "pp" = percentage points.

| <b>Variable</b>       | <b>Delta</b> | $\Delta P_{USE}$              | $\Delta E_{POS}$              | $\Delta E_{TOT}$              |
|-----------------------|--------------|-------------------------------|-------------------------------|-------------------------------|
| <i>Age</i>            | 10 years     | -0.0025<br>(-0.0026, -0.0024) | 0.0255<br>(0.0250, 0.0261)    | 0.0055<br>(0.0052, 0.0059)    |
| <i>Sqft</i>           | 500 sqft     | -0.0063<br>(-0.0064, -0.0061) | 0.0233<br>(0.0224, 0.0244)    | -0.0064<br>(-0.0070, -0.0057) |
| <i>Bedrooms</i>       | 1 bedroom    | 0.0002<br>(0.0000, 0.0004)    | -0.0047<br>(-0.0060, -0.0033) | -0.0017<br>(-0.0026, -0.0008) |
| <i>Value</i>          | \$250 k      | 0.0054<br>(0.0053, 0.0055)    | 0.0418<br>(0.0409, 0.0427)    | 0.0366<br>(0.0359, 0.0372)    |
| <i>MedianInc</i>      | \$10 k       | 0.0055<br>(0.0054, 0.0055)    | 0.0328<br>(0.0321, 0.0333)    | 0.0321<br>(0.0316, 0.0324)    |
| <i>Unemployment</i>   | 10 pp        | -0.0269<br>(-0.0272, -0.0266) | -0.0744<br>(-0.0771, -0.0724) | -0.1123<br>(-0.1142, -0.1110) |
| <i>Renting</i>        | 10 pp        | 0.0009<br>(0.0008, 0.0010)    | 0.0287<br>(0.0277, 0.0297)    | 0.0170<br>(0.0164, 0.0177)    |
| <i>LivingAlone</i>    | 10 pp        | 0.0159<br>(0.0157, 0.0162)    | 0.0439<br>(0.0420, 0.0455)    | 0.0680<br>(0.0666, 0.0691)    |
| <i>Crowding</i>       | 10 pp        | 0.0014<br>(0.0008, 0.0020)    | 0.1439<br>(0.1404, 0.1489)    | 0.0759<br>(0.0734, 0.0792)    |
| <i>Elderly</i>        | 10 pp        | -0.0125<br>(-0.0127, -0.0122) | -0.0143<br>(-0.0162, -0.0124) | -0.0426<br>(-0.0439, -0.0413) |
| <i>OutdoorWorkers</i> | 10 pp        | 0.0054<br>(0.0051, 0.0059)    | 0.0123<br>(0.0098, 0.0150)    | 0.0218<br>(0.0200, 0.0240)    |
| <i>ForeignBorn</i>    | 10 pp        | -0.0084<br>(-0.0085, -0.0082) | -0.0229<br>(-0.0242, -0.0218) | -0.0351<br>(-0.0359, -0.0344) |
| <i>NonWhite</i>       | 10 pp        | 0.0049<br>(0.0048, 0.0050)    | 0.0285<br>(0.0278, 0.0292)    | 0.0283<br>(0.0279, 0.0287)    |
| <i>HispanicLatino</i> | 10 pp        | 0.0027<br>(0.0026, 0.0028)    | 0.0424<br>(0.0416, 0.0430)    | 0.0290<br>(0.0285, 0.0294)    |
| <i>CDH205</i>         | 10 CDH       | 0.0309<br>(0.0309, 0.0310)    | 0.0964<br>(0.0962, 0.0966)    | 0.1389<br>(0.1388, 0.1391)    |
| <i>meanRH</i>         | 10 pp        | 0.0049<br>(0.0048, 0.0050)    | 0.1673<br>(0.1661, 0.1686)    | 0.0981<br>(0.0976, 0.0989)    |

Table S7: Nighttime average discrete changes (ADC) in probability of any cooling use ( $\Delta P_{USE}$ ), expected hours given some cooling ( $\Delta E_{POS}$ ), and total expected hours ( $\Delta E_{TOT}$ ). The 95th percentile interval is given in parenthesis. "pp" = percentage points.

| <b>Variable</b>       | <b>CL, D</b> |           | <b>CL, N</b> |           | <b>non-CL, D</b> |           | <b>non-CL, N</b> |           |
|-----------------------|--------------|-----------|--------------|-----------|------------------|-----------|------------------|-----------|
|                       | $\beta$      | $P >  z $ | $\beta$      | $P >  z $ | $\beta$          | $P >  z $ | $\beta$          | $P >  z $ |
| <i>Age</i>            | -0.001       | 0.000     | -0.001       | 0.000     | 0.001            | 0.000     | 0.001            | 0.000     |
| <i>Sqft</i>           | 0.000        | 0.000     | 0.000        | 0.000     | 0.000            | 0.000     | 0.000            | 0.000     |
| <i>Bedrooms</i>       | -0.006       | 0.003     | -0.004       | 0.060     | -0.002           | 0.382     | -0.001           | 0.523     |
| <i>Value</i>          | 0.000        | 0.000     | 0.000        | 0.000     | 0.000            | 0.000     | 0.000            | 0.000     |
| <i>MedianInc</i>      | 0.000        | 0.000     | 0.001        | 0.000     | 0.000            | 0.780     | 0.000            | 0.003     |
| <i>Unemployment</i>   | -0.021       | 0.374     | -0.078       | 0.002     | 0.051            | 0.002     | 0.013            | 0.358     |
| <i>Renting</i>        | -0.108       | 0.000     | -0.094       | 0.000     | -0.103           | 0.000     | -0.090           | 0.000     |
| <i>LivingAlone</i>    | 0.034        | 0.082     | 0.025        | 0.247     | -0.074           | 0.000     | -0.048           | 0.000     |
| <i>Crowding</i>       | -0.634       | 0.000     | -0.418       | 0.000     | 0.028            | 0.383     | 0.073            | 0.014     |
| <i>Elderly</i>        | -0.174       | 0.000     | -0.154       | 0.000     | -0.120           | 0.000     | -0.168           | 0.000     |
| <i>OutdoorWorkers</i> | -0.061       | 0.038     | -0.004       | 0.902     | 0.202            | 0.000     | 0.200            | 0.000     |
| <i>ForeignBorn</i>    | -0.086       | 0.000     | -0.067       | 0.000     | -0.106           | 0.000     | -0.099           | 0.000     |
| <i>NonWhite</i>       | -0.036       | 0.000     | 0.005        | 0.620     | -0.090           | 0.000     | -0.027           | 0.000     |
| <i>HispanicLatino</i> | -0.086       | 0.000     | -0.034       | 0.000     | -0.054           | 0.000     | -0.004           | 0.389     |
| <i>meanRH</i>         | 0.001        | 0.000     | 0.001        | 0.000     | 0.001            | 0.000     | 0.001            | 0.000     |

Table S8: Coefficients ( $\beta$ ) and significance ( $P > |z|$ ) of daytime ("D") and nighttime ("N") cooling load ("CL") and non-cooling load ("non-CL"), obtained from the OLS regression.

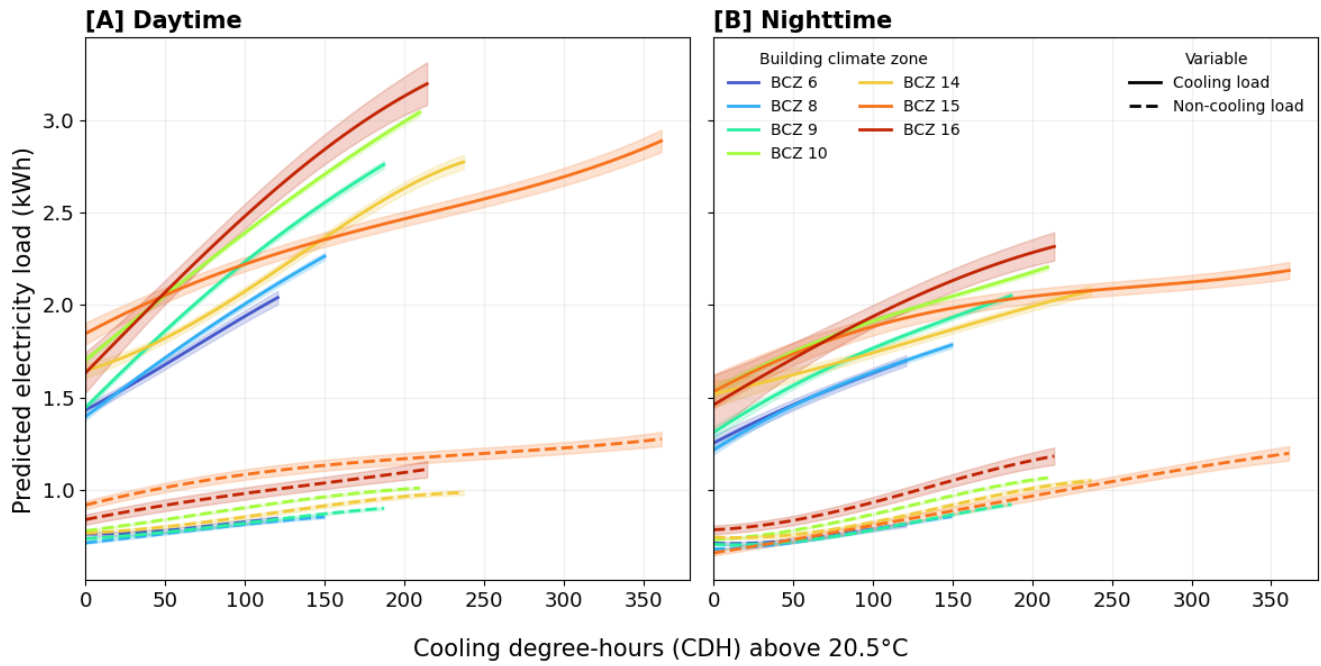

Figure S1: Predicted (a) daytime and (b) nighttime electricity loads as a function of cooling degree-hours (CDH) above 20.5°C, split by building climate zone (BCZ). Solid lines denote cooling loads and dashed lines denote non-cooling loads. Curves are shown for the central 95% of the observed CDH distribution for each BCZ. The shaded region indicates the 95% confidence interval in the fitted mean.

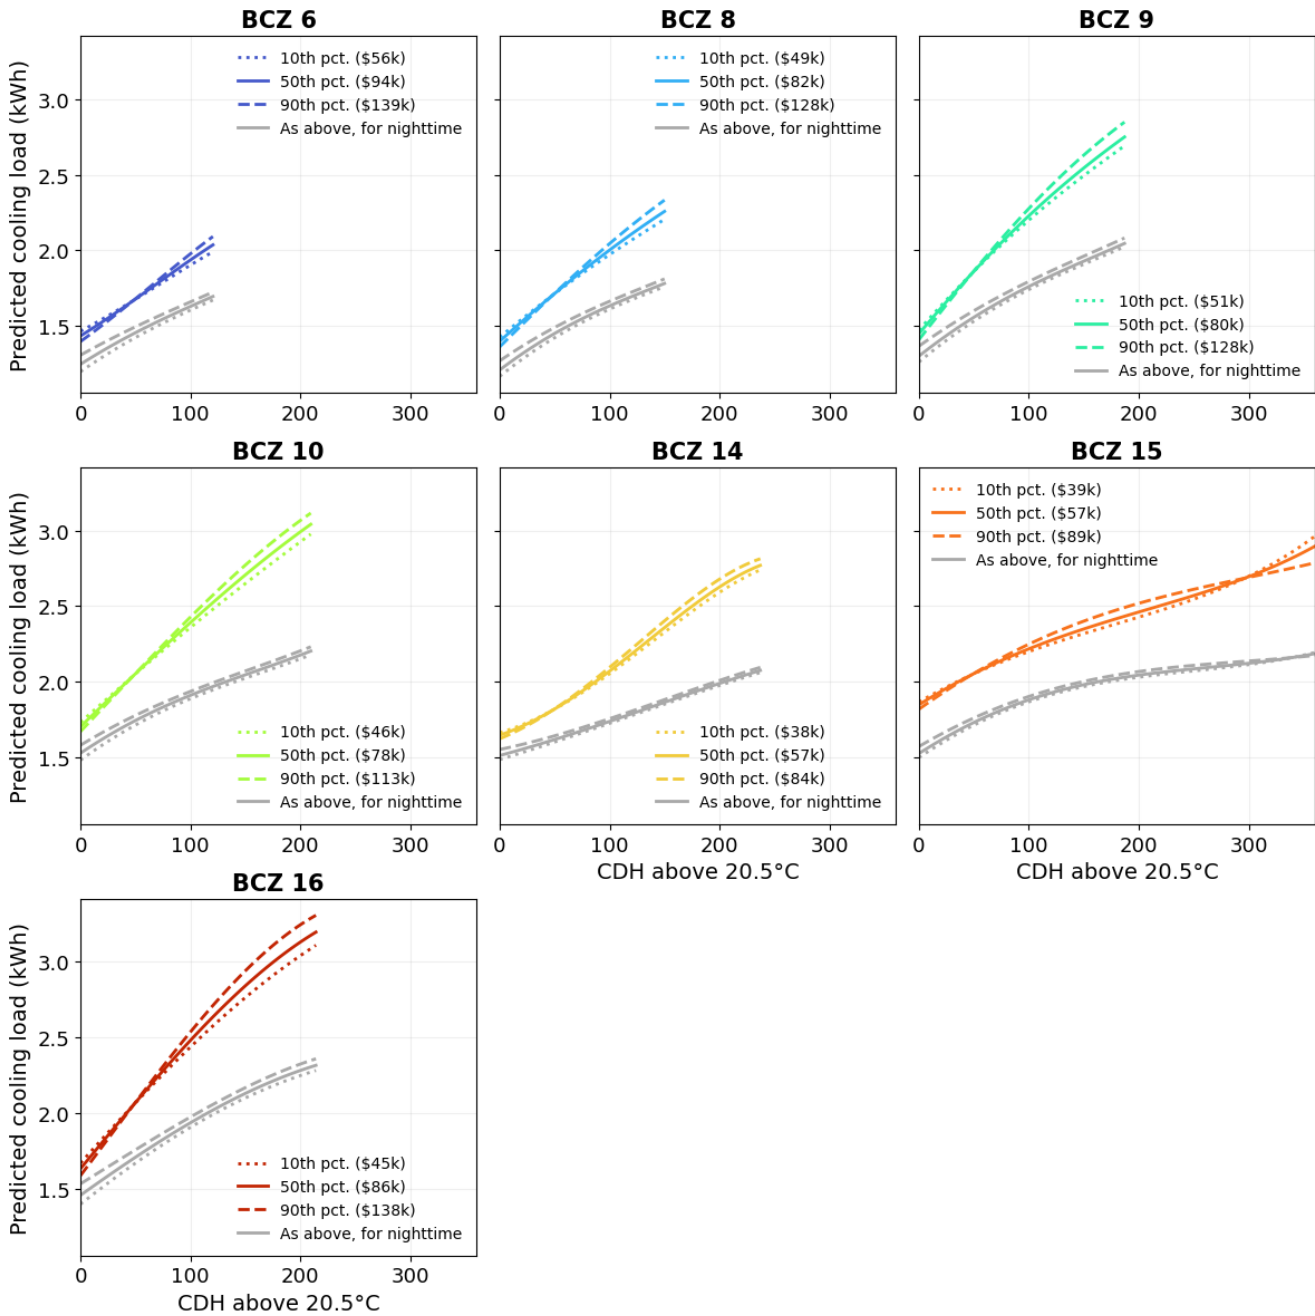

Figure S2: Predicted cooling electricity load as a function of cooling degree-hours (CDH) above 20.5°C, by climate zone and income levels. Dotted lines denote the 10th percentile by income, solid lines denote the median, and dashed lines denote the 90th percentile. Colored lines indicate daytime cooling loads, and gray lines indicate nighttime cooling loads. Curves are shown for the central 95% of the observed CDH distribution for each BCZ.

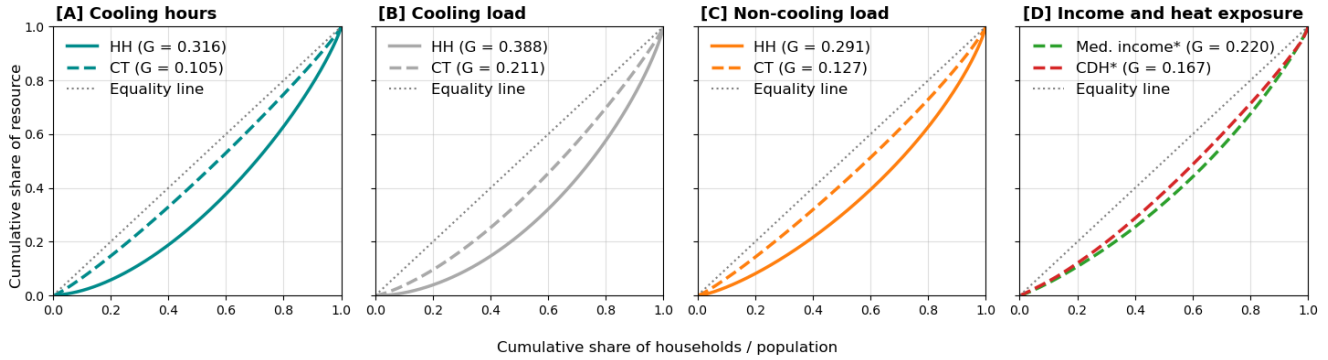

Figure S3: Lorenz curves for (a) cooling hours, (b) cooling load and (c) non-cooling load, computed at the household (HH) and census tract (CT) levels. For reference, panel d shows median income and cooling degree-hours (CDH) (the asterisk denotes that these are both computed at the CT-level). The Gini index (G) for each curve is shown in the legend.

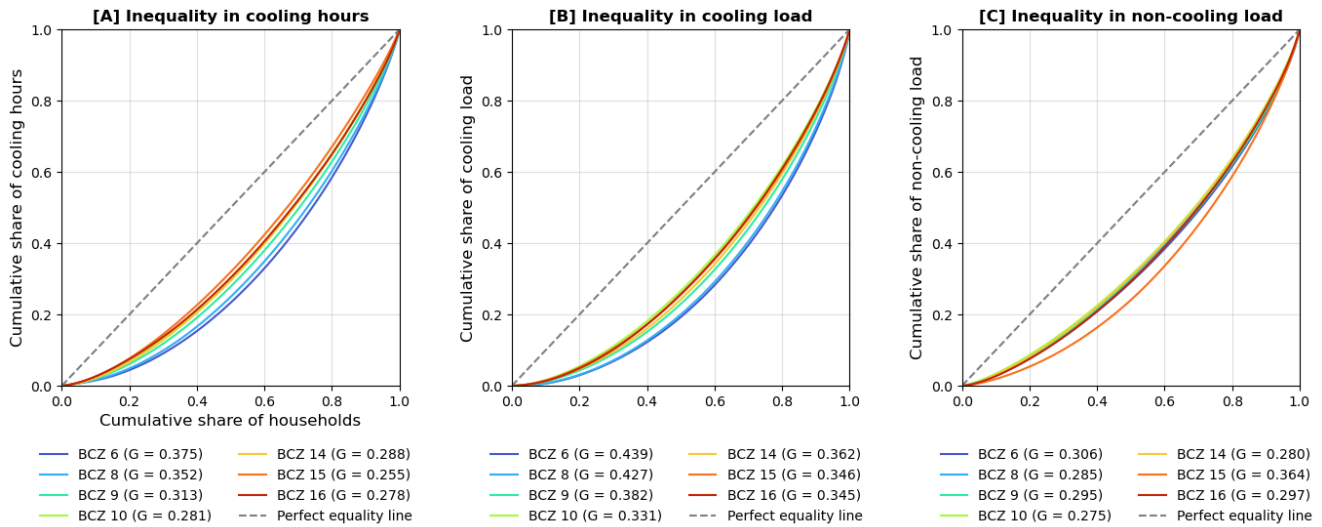

Figure S4: Lorenz curves for (a) cooling hours, (b) cooling load and (c) non-cooling load, stratified by building climate zone (BCZ). The Gini index (G) for each curve is shown in the legend.

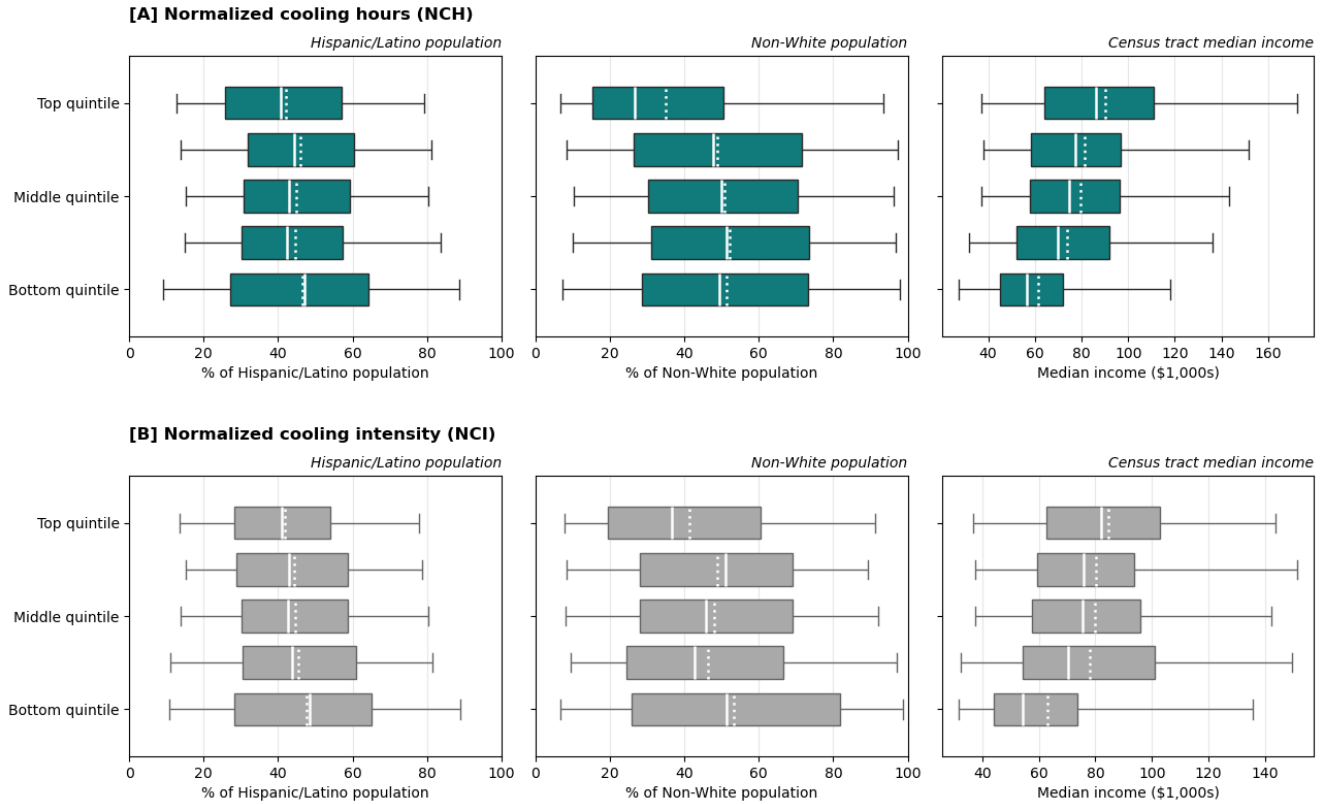

Figure S5: Boxplots show the percentage of non-White population (first column), percentage of Hispanic/Latino population (second column), and median income (third column) for quintiles of (a) normalized cooling hours and (b) normalized cooling intensity. Boxplot whiskers represent the 95th percentile.

| Cooling metric | Demographic variable       | $U$     | $n_1$ | $n_2$ | $p$                    |
|----------------|----------------------------|---------|-------|-------|------------------------|
| <i>NCH</i>     | Non-White population       | 433,036 | 455   | 1,818 | $4.16 \times 10^{-2}$  |
| <i>NCH</i>     | Hispanic/Latino population | 454,899 | 455   | 1,818 | $1.17 \times 10^{-21}$ |
| <i>NCI</i>     | Non-White population       | 447,225 | 455   | 1,817 | $2.34 \times 10^{-4}$  |
| <i>NCI</i>     | Hispanic/Latino population | 466,647 | 455   | 1,817 | $1.18 \times 10^{-6}$  |

Table S9: Results of one-tailed Mann-Whitney U-tests comparing the demographic composition of census tracts in the lowest quintile of normalized cooling hours (NCH) and normalized cooling intensity (NCI) ( $n_1$ ) with that of all remaining tracts ( $n_2$ ).

| <b>Cooling metric</b> | <b>Demographic variable</b> | <b>Direction</b> | $U$     | $n_1$ | $n_2$ | $p$                    |
|-----------------------|-----------------------------|------------------|---------|-------|-------|------------------------|
| <i>NCH</i>            | Non-White population        | $C_{LL} > C_o$   | 468,160 | 409   | 1,864 | $2.31 \times 10^{-13}$ |
| <i>NCH</i>            | Hispanic/Latino population  | $C_{LL} > C_o$   | 487,603 | 409   | 1,864 | $2.64 \times 10^{-16}$ |
| <i>NCH</i>            | Median income               | $C_{LL} < C_o$   | 262,019 | 416   | 1,882 | $2.08 \times 10^{-26}$ |
| <i>NCI</i>            | Non-White population        | $C_{LL} > C_o$   | 444,836 | 413   | 1,860 | $2.39 \times 10^{-7}$  |
| <i>NCI</i>            | Hispanic/Latino population  | $C_{LL} > C_o$   | 461,063 | 413   | 1,860 | $8.87 \times 10^{-11}$ |
| <i>NCI</i>            | Median income               | $C_{LL} < C_o$   | 259,630 | 416   | 1,877 | $1.70 \times 10^{-28}$ |

Table S10: Results of one-tailed Mann-Whitney U-tests comparing the demographic composition of census tracts in the *Low-Low* cluster ( $C_{LL}$ ) for normalized cooling hours (NCH) and normalized cooling intensity (NCI) (sample count  $n_1$ ) with that of all remaining clusters ( $C_o$ ; sample count  $n_2$ ). The Direction column specifies the direction of the one-tailed test.

797 SI.11. Choropleth maps of spatial clusters for different BCZ

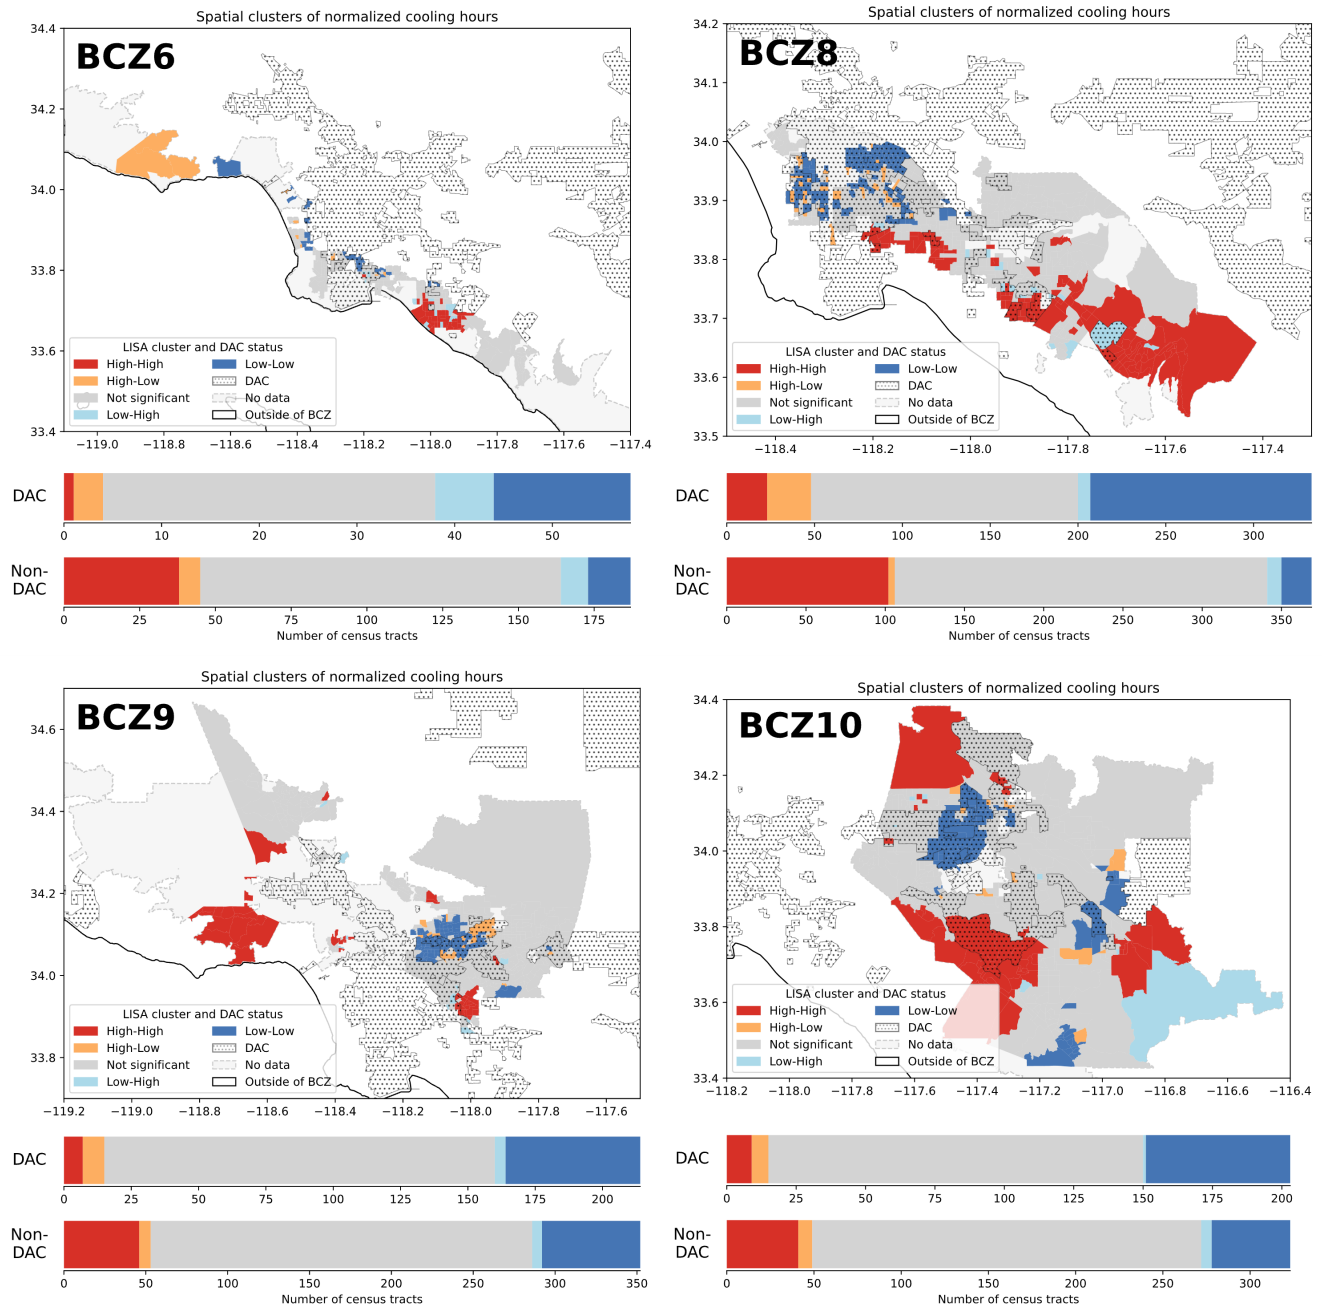

Figure S6: Maps showing spatial clusters of normalized cooling hours (NCH) identified in BCZ 6, 8, 9 and 10 (left to right, top to bottom). Disadvantaged communities (DACs) are represented with dotting. The two stacked bars under each map show the count of census tracts in DAC and non-DAC census tracts, split by cluster type.

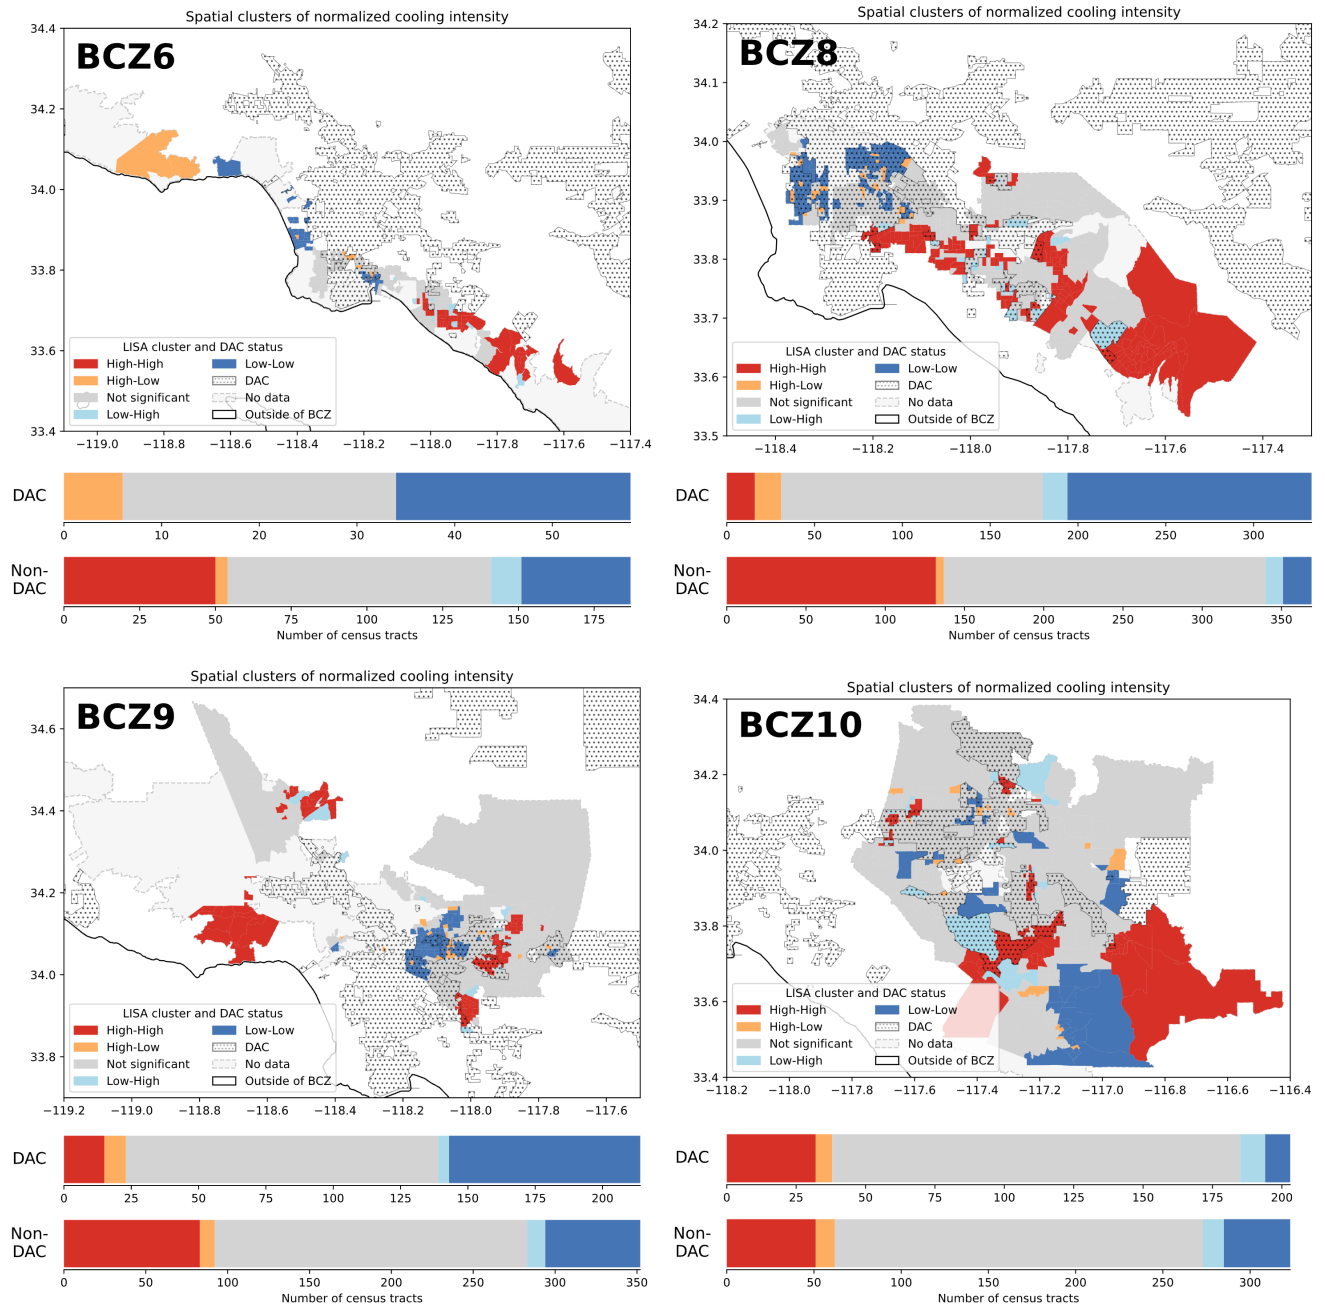

Figure S7: Maps showing spatial clusters of normalized cooling intensity (NCI) identified in BCZ 6, 8, 9 and 10 (left to right, top to bottom). Disadvantaged communities (DACs) are represented with dotting. The two stacked bars under each map show the count of census tracts in DAC and non-DAC census tracts, split by cluster type.

798 SI.12. AC operation data from Peplinski et al., 2025

799 AC operation data was obtained using multiple linear regression model described in Equation S1  
800 (adapted from Equation 1 in Peplinski et al. [39]). This model allowed the classification of hourly smart-  
801 meter electricity data of households in Southern California into AC (cooling state = 1) and non-AC hours  
802 (cooling state = 0).

803

$$E_t = \mathbf{D}_{t \in h,w,s} + \begin{cases} 0 & \text{if } H_t = C_t = 0 \\ \beta_1 \times (SPT_H - T_t) + i & \text{if } C_t = 1 \\ \beta_2 \times (T_t - SPT_C) + j & \text{if } H_t = 1 \end{cases} \quad (\text{S1})$$

804 where  $E_t$  is the electricity consumed in hour  $t$ ,  $\mathbf{D}$  is a vector of dummy variables for a given hour of  
805 day  $h$ , day type  $w$  (weekday versus weekend), and temperature group  $s$  (high or low temperature);  $\beta_1$   
806 and  $\beta_2$  are the electricity-temperature sensitivity for heating and cooling, respectively;  $SPT_H$  and  $SPT_C$   
807 are the setpoint temperatures for heating and cooling, respectively;  $i$  and  $j$  are the respective intercepts;  
808  $T_t$  is the outdoor temperature at that hour; and  $H_t$  and  $C_t$  are binary variables indicating the heating  
809 and cooling state at that hour. For our purposes, we ignored  $H_t = 1$  hours (when electric heating was  
810 occurring), therefore classifying each hour  $t$  as either an AC on hour ( $C_t = 1$ ) or AC off hour ( $C_t = 0$ ),  
811 irrespective of the heating state.

812 *SI.13. Logistic regression to model cooling hours*

813 We modeled the daily cooling hours using a two-stage (hurdle) logistic regression model. The first  
 814 stage was a binary logistic regression, which predicts the probability  $\pi_i = P(H_{C,i} > 0 | X_i)$  of *any* cooling  
 815 use for a given household-day  $i$  and a vector of independent variables  $X_i$ . Equation S2 shows the linear  
 816 predictors of the binary logistic stage ( $\eta_i^{(B)}$ ), such that  $\pi_i = \sigma(\eta_i^{(B)})$ , where  $\sigma$  is the logistic function.

$$\eta_i^{(B)} = \beta_0 + \beta^{(B)\top} X_i + \zeta^{(B)\top} \text{BCZ}_i + \kappa^{(B)\top} S_i + \alpha^{(B)\top} b(\text{doy}_i) \quad (\text{S2})$$

817 In the above equation,  $\beta_0$  is the intercept,  $\beta^{(B)}$  is a column vector of coefficients on linear covariates  
 818  $X_i$  (see Table S1),  $\zeta^{(B)}$  is the vector of coefficients on building climate zone (BCZ) indicator variables,  
 819  $\kappa^{(B)}$  is the vector of coefficients on period of the year ( $S$ ) indicator variables, and  $\alpha^{(B)}$  is the vector of  
 820 coefficients on  $b(\text{doy}_i)$ , a spline basis function evaluated at day-of-year. The vector of covariates  $X_i$  con-  
 821 tains all the variables listed in Table S1.

822  
 823 The second stage of the logistic model was an ordered logistic regression for positive cooling hour  
 824 counts, which determines the cumulative probability  $\gamma_{i,k}$  for  $k$  cooling hours, for a given household-  
 825 day  $i$ . Using thresholds (or *cutoff points*)  $\tau_k$  for  $k = 1, 2, \dots, 11$  the logistic function can be written as  
 826  $\gamma_{i,k} = \sigma(\tau_k - \eta_i^{(O)})$  where  $\eta_i^{(O)}$  is the linear predictor of the ordered logistic model (Equation S3). Note  
 827 that the structure of  $\eta_i^{(O)}$  is the same as  $\eta_i^{(B)}$ , except in this case we drop the intercept.

$$\eta_i^{(O)} = \beta^{(O)\top} X_i + \zeta^{(O)\top} \text{BCZ}_i + \kappa^{(O)\top} S_i + \alpha^{(O)\top} b(\text{doy}_i) \quad (\text{S3})$$

828 We obtained  $q_{i,k}$ , the probability of a specific category  $k$ , by comparing the cumulative probabilities  
 829 of  $k$  and of  $k - 1$  (Equation S4). Then, we obtained the unconditional expected cooling hours,  $\mu_i$ , by  
 830 multiplying the probability of cooling  $\pi_i$  by the (conditional) expected values for each category of cool-  
 831 ing hours  $m_i$  (Equation S5). Finally, we measured the effect on expected cooling hours resulting from  
 832 a change  $\Delta x_j$  in a predictor  $j$ . We averaged this effect across all observations  $N$  to obtain the average  
 833 discrete change (ADC) for the total expected cooling hours (Equation S6). We also obtained the ADC for  
 834 the probability of cooling  $\pi_i$  and the conditional expected cooling hours  $m_i$ .

$$q_{i,k} = \gamma_{i,k} - \gamma_{i,k-1} \quad (\text{S4})$$

$$\mu_i = \pi_i \cdot m_i = \pi_i \sum_{k=0}^{12} k \cdot q_{i,k} \quad (\text{S5})$$

$$\text{ADC}_j^{(\mu)} = \frac{1}{N} \sum_{i=1}^N \Delta \mu_i \quad (\text{S6})$$

835 *SI.14. Ordinary least squares regression to model cooling load*

836 We modeled the average hourly cooling and non-cooling load ( $\overline{E_C}$  and  $\overline{E_{NC}}$ ) with ordinary least  
 837 squares (OLS) regression. In order to satisfy the assumptions of OLS, we log-transformed the outcomes  
 838  $\overline{E_C}$  and  $\overline{E_{NC}}$ . The linear predictor was defined based on a vector of linear covariates, spline basis  
 839 functions, and indicator variables, as shown in Equation S7.

$$\log(1 + Z_i) = \beta_0 + \beta^\top X_i + \theta^\top b(T_i) + \zeta^\top \text{BCZ}_i + \kappa^\top S_i + \alpha^\top b(\text{doy}_i) + \lambda^\top (\text{Inc}_i \cdot b(T_i)) + \varepsilon_i, \quad (\text{S7})$$

840 where  $Z$  is the cooling or non-cooling load,  $\beta_0$  is the intercept,  $\beta$  is a column vector of coefficients  
 841 on linear covariates  $X_i$  (see Table S1);  $\theta$  represents the coefficients on  $b(T_i)$ , the spline basis function for  
 842 the temperature term;  $\zeta$  is the vector of coefficients on building climate zone (BCZ) indicator variables;  
 843  $\kappa$  is the vector of coefficients on period of the year ( $S$ ) indicator variables;  $\alpha$  is the vector of coefficients  
 844 on  $b(\text{doy}_i)$ , a spline basis function evaluated at day-of-year;  $\lambda$  is the coefficient of the interaction term  
 845 between median income ( $\text{Inc}_i$ ) and the temperature spline ( $b(T_i)$ ); and  $\varepsilon$  is the error term. In this case,  
 846 the temperature term was removed from  $X_i$  to avoid redundancy. Since the dependent variable was  
 847 specified as  $\log(1 + Z_i)$ , we report average percent changes computed for a discrete change  $\Delta x_j$ , averaged  
 848 across observations.

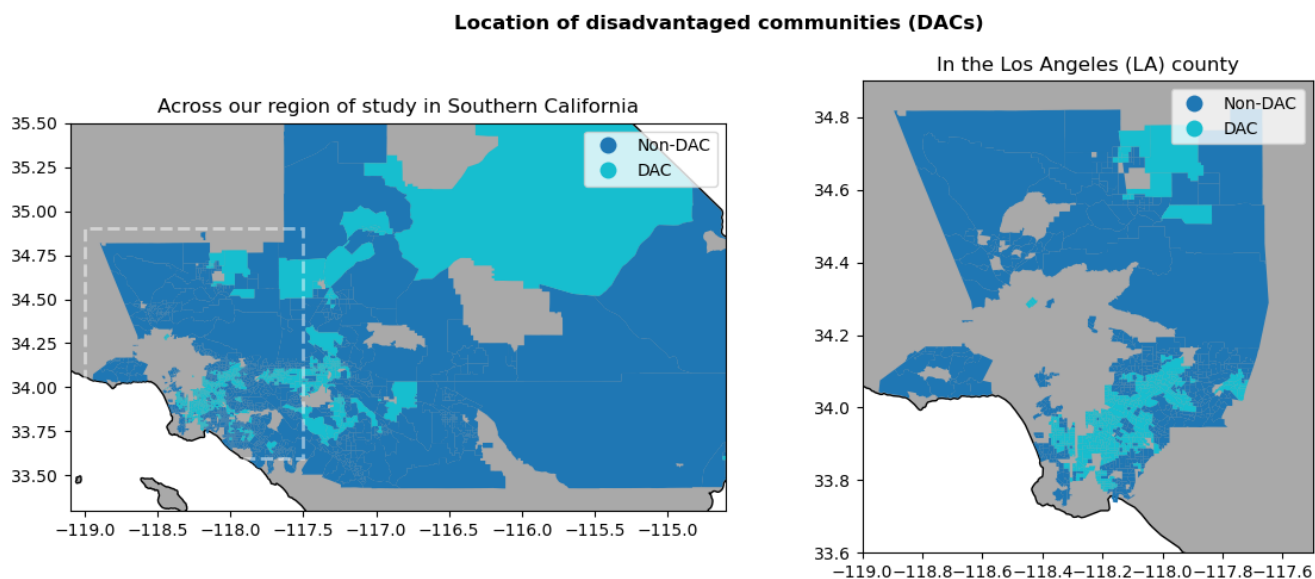

Figure S8: Maps showing locations of disadvantaged communities (DACs), as defined by CalEPA [48], across our region of study (left) and zoomed into the Los Angeles county (right).
